# Supplementary material for: Timing of whole genome duplication is associated with tumor-specific MHC-II depletion in serous ovarian cancer
Source: PubMed Central journal article supplement (PMC11258338; doi:10.1038/s41467-024-50137-y), 2024-07-18
Supplement: 41467_2024_50137_MOESM1_ESM.pdf [file 41467_2024_50137_MOESM1_ESM.pdf]

Supplementary information file for:

## **Timing of whole genome duplication is associated with tumor-specific MHC-II depletion in serous ovarian cancer**

### ***Authors***

Burdett, Nikki L<sup>1,2,3</sup>, Willis, Madelynne O<sup>1</sup>, Pandey, Ahwan<sup>1</sup>, Twomey, Laura<sup>1</sup>, Alaei, Sara<sup>1,4</sup>, Australian Ovarian Cancer Study Group†<sup>1</sup>, Bowtell, David DL<sup>1,2</sup>, Christie, Elizabeth L<sup>1,2\*</sup>

### ***Affiliations***

1. Peter MacCallum Cancer Centre, Melbourne, Victoria 3000, Australia
2. Sir Peter MacCallum Department of Oncology, The University of Melbourne, Victoria 3010, Australia
3. Box Hill Hospital, Eastern Health, Box Hill, Victoria, 3128, Australia
4. Australian Regenerative Medicine Institute, Monash University, Clayton, Victoria 3168, Australia

a

No WGD

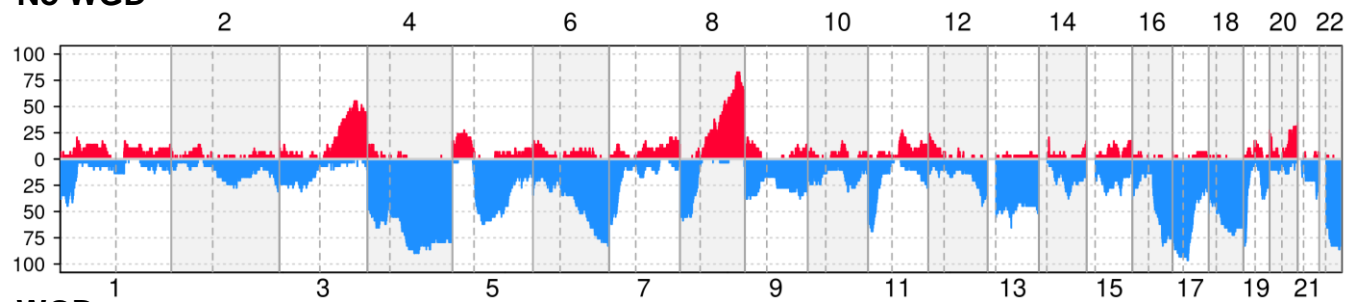

WGD

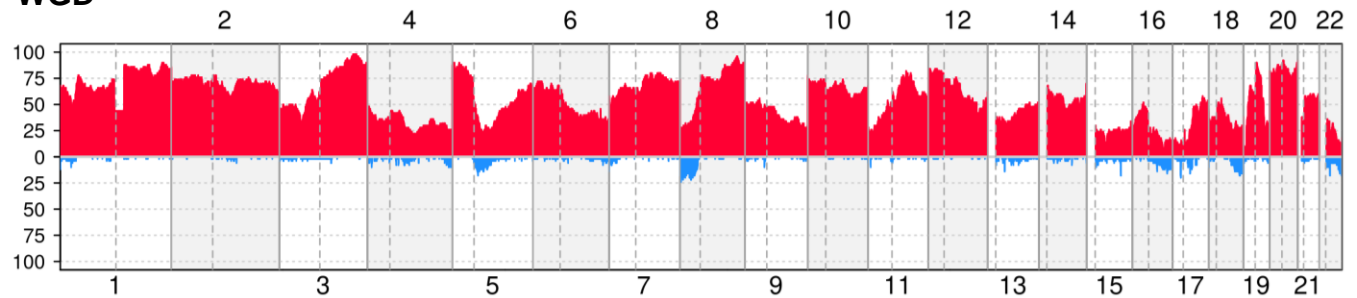

b

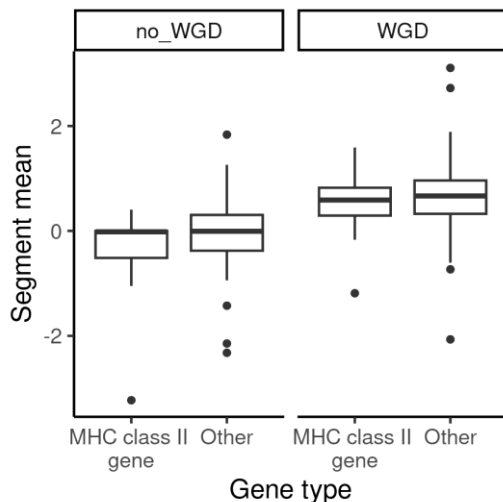

c

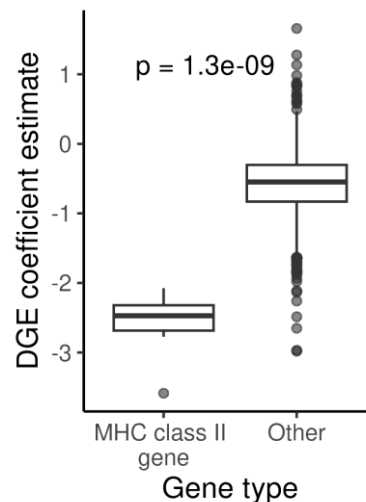

### Supplementary Fig. 1. Whole genome duplication copy number and expression analyses.

a. Copy number frequency plots by chromosome for patients in the ICGC cohort with no whole genome duplication (WGD; top) and with WGD (bottom). Gain/loss threshold =  $\pm 0.4$ , gains colored red and losses colored blue. b. Boxplots of copy number segment means in cytobands 6p21.31 – 6p25.22 by whether gene is an MHC class II gene or any other gene;  $p = 0.09$ , glmm.  $n = 79$  patient samples c. Boxplots of coefficient estimates from DGE model in cytobands 6p21.31 – 6p25.22 by whether gene is an MHC class II gene or any other gene;  $p < 0.001$ , Wilcoxon's test.  $n = 79$  patient samples. For figures b and c: Left and right whiskers terminate at the minimum and maximum values no further than  $1.5 \times$  interquartile range; center line represents median (50<sup>th</sup> percentile); left and right boundaries of box represent the first (25<sup>th</sup> percentile) and third (75<sup>th</sup> percentile) quartiles, respectively; outlying values are plotted as individual points beyond whiskers. Source data are provided as a Source Data file.

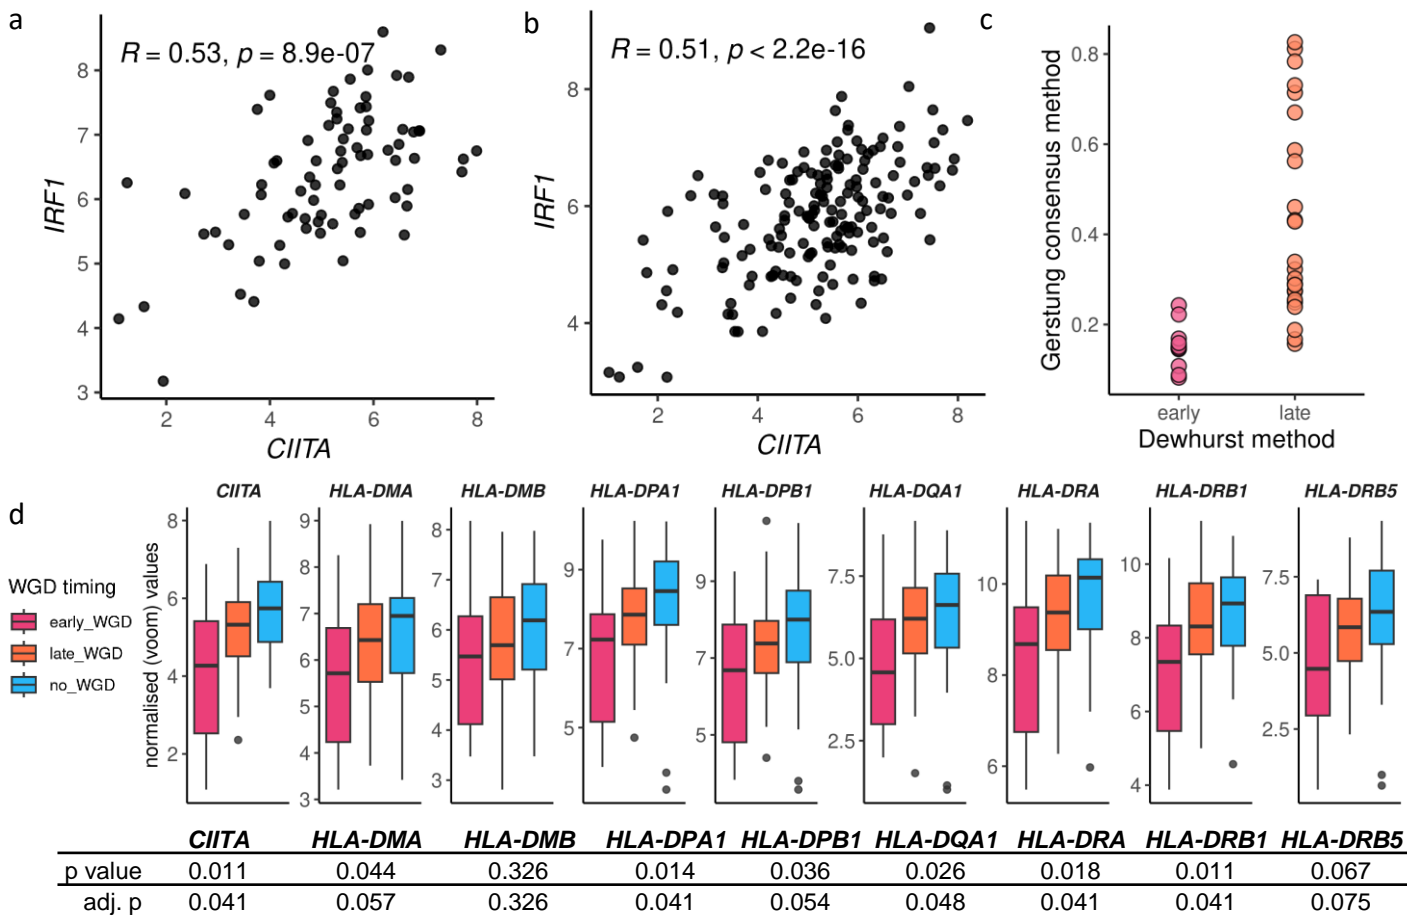

**e**

| Characteristic  | log(HR) <sup>†</sup> | 95% CI <sup>†</sup> | p-value |
|-----------------|----------------------|---------------------|---------|
| WGD_status      |                      |                     |         |
| early_WGD       | —                    | —                   |         |
| late_WGD        | -0.54                | -0.88, -0.20        | 0.002   |
| no_WGD          | -0.44                | -0.82, -0.06        | 0.025   |
| Age             | 0.02                 | 0.01, 0.04          | <0.001  |
| Stage           |                      |                     |         |
| [Not Available] | —                    | —                   |         |
| IB              | -17                  | -15,446, 15,413     | >0.9    |
| IC              | -0.49                | -2.5, 1.5           | 0.6     |
| IIA             | -15                  | -2,606, 2,575       | >0.9    |
| IIB             | -1.0                 | -3.4, 1.4           | 0.4     |
| IIC             | -1.2                 | -3.0, 0.61          | 0.2     |
| IIIA            | -0.24                | -2.1, 1.6           | 0.8     |
| IIIB            | -0.68                | -2.4, 1.0           | 0.4     |
| IIIC            | -0.35                | -1.8, 1.1           | 0.6     |
| IV              | -0.24                | -1.7, 1.2           | 0.7     |

<sup>†</sup> HR = Hazard Ratio, CI = Confidence Interval

**f**

| Characteristic  | log(HR) <sup>†</sup> | 95% CI <sup>†</sup> | p-value |
|-----------------|----------------------|---------------------|---------|
| WGD_status      |                      |                     |         |
| early_WGD       | —                    | —                   |         |
| late_WGD        | -0.41                | -0.74, -0.09        | 0.012   |
| no_WGD          | -0.56                | -0.92, -0.19        | 0.003   |
| Age             | 0.00                 | -0.01, 0.02         | 0.4     |
| Stage           |                      |                     |         |
| [Not Available] | —                    | —                   |         |
| IB              | -12                  | -3,030, 3,006       | >0.9    |
| IC              | 0.91                 | -1.4, 3.2           | 0.4     |
| IIA             | 0.08                 | -2.7, 2.9           | >0.9    |
| IIB             | 0.16                 | -2.6, 2.9           | >0.9    |
| IIC             | 0.72                 | -1.4, 2.8           | 0.5     |
| IIIA            | 0.46                 | -1.8, 2.7           | 0.7     |
| IIIB            | 0.50                 | -1.7, 2.7           | 0.6     |
| IIIC            | 1.3                  | -0.64, 3.3          | 0.2     |
| IV              | 1.4                  | -0.58, 3.4          | 0.2     |

<sup>†</sup> HR = Hazard Ratio, CI = Confidence Interval

## **Supplementary Fig. 2. Bulk RNAseq analyses.**

a. Correlation of expression of *C/ITA* and its positive regulator *IRF1* in the ICGC cohort, Spearman's rho = ICGC 0.53,  $p < 0.001$ , and b. the TCGA cohort, Spearman's rho = 0.51,  $p < 0.001$ . n = 79 patient samples. c. Comparison of numerical value inferred by Gerstung et al. for relative timing of whole genome duplication (WGD; y axis) and categorical method by Dewhurst et al. (x axis) Early WGD n = 12, Late WGD n = 24. d. Boxplots of *C/ITA* and MHC-II gene expression in the ICGC cohort by timing of WGD; comparisons performed with Kruskal-Wallis test. Left and right whiskers terminate at the minimum and maximum values no further than 1.5× interquartile range; center line represents median (50<sup>th</sup> percentile); left and right boundaries of box represent the first (25<sup>th</sup> percentile) and third (75<sup>th</sup> percentile) quartiles, respectively; outlying values are plotted as individual points beyond whiskers. Early WGD n = 16 patient samples, Late WGD n = 34 patient samples, No WGD = 29 patient samples. e. Summary of Cox proportional hazard multivariate analysis for overall survival (OS) by WGD status. f. Summary of Cox proportional hazard multivariate analysis for progression free survival (PFS) by WGD status. Source data are provided as a Source Data file.

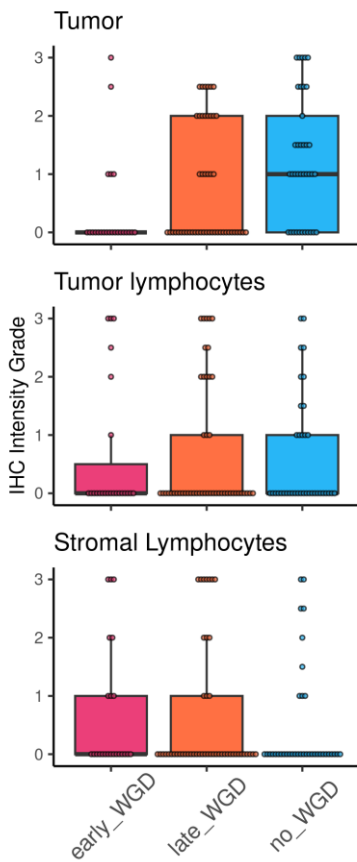

| Location            | Statistic | Adj. p value |
|---------------------|-----------|--------------|
| Tumor cells         | 4.276     | 0.049        |
| TILs                | 0.427     | 0.734        |
| Stromal lymphocytes | 0.311     | 0.734        |

**Supplementary Fig. 3. Immunohistochemistry staining intensity results.**

Boxplots overlaid with dots to show distribution of values, showing immunohistochemistry (IHC) intensity by timing of WGD and by cell type (tumor, tumor infiltrating lymphocyte (TIL) and stromal lymphocyte). Joint p values comparing IHC intensity derived from generalized linear mixed modelling on each location included in table below plots. Left and right whiskers terminate at the minimum and maximum values no further than 1.5×interquartile range; center line represents median (50<sup>th</sup> percentile); left and right boundaries of box represent the first (25<sup>th</sup> percentile) and third (75<sup>th</sup> percentile) quartiles, respectively; outlying values are plotted as individual points beyond whiskers. Early WGD n = 23 cores; Late WGD n = 49 cores; No WGD n = 37 cores. Source data are provided as a Source Data file.

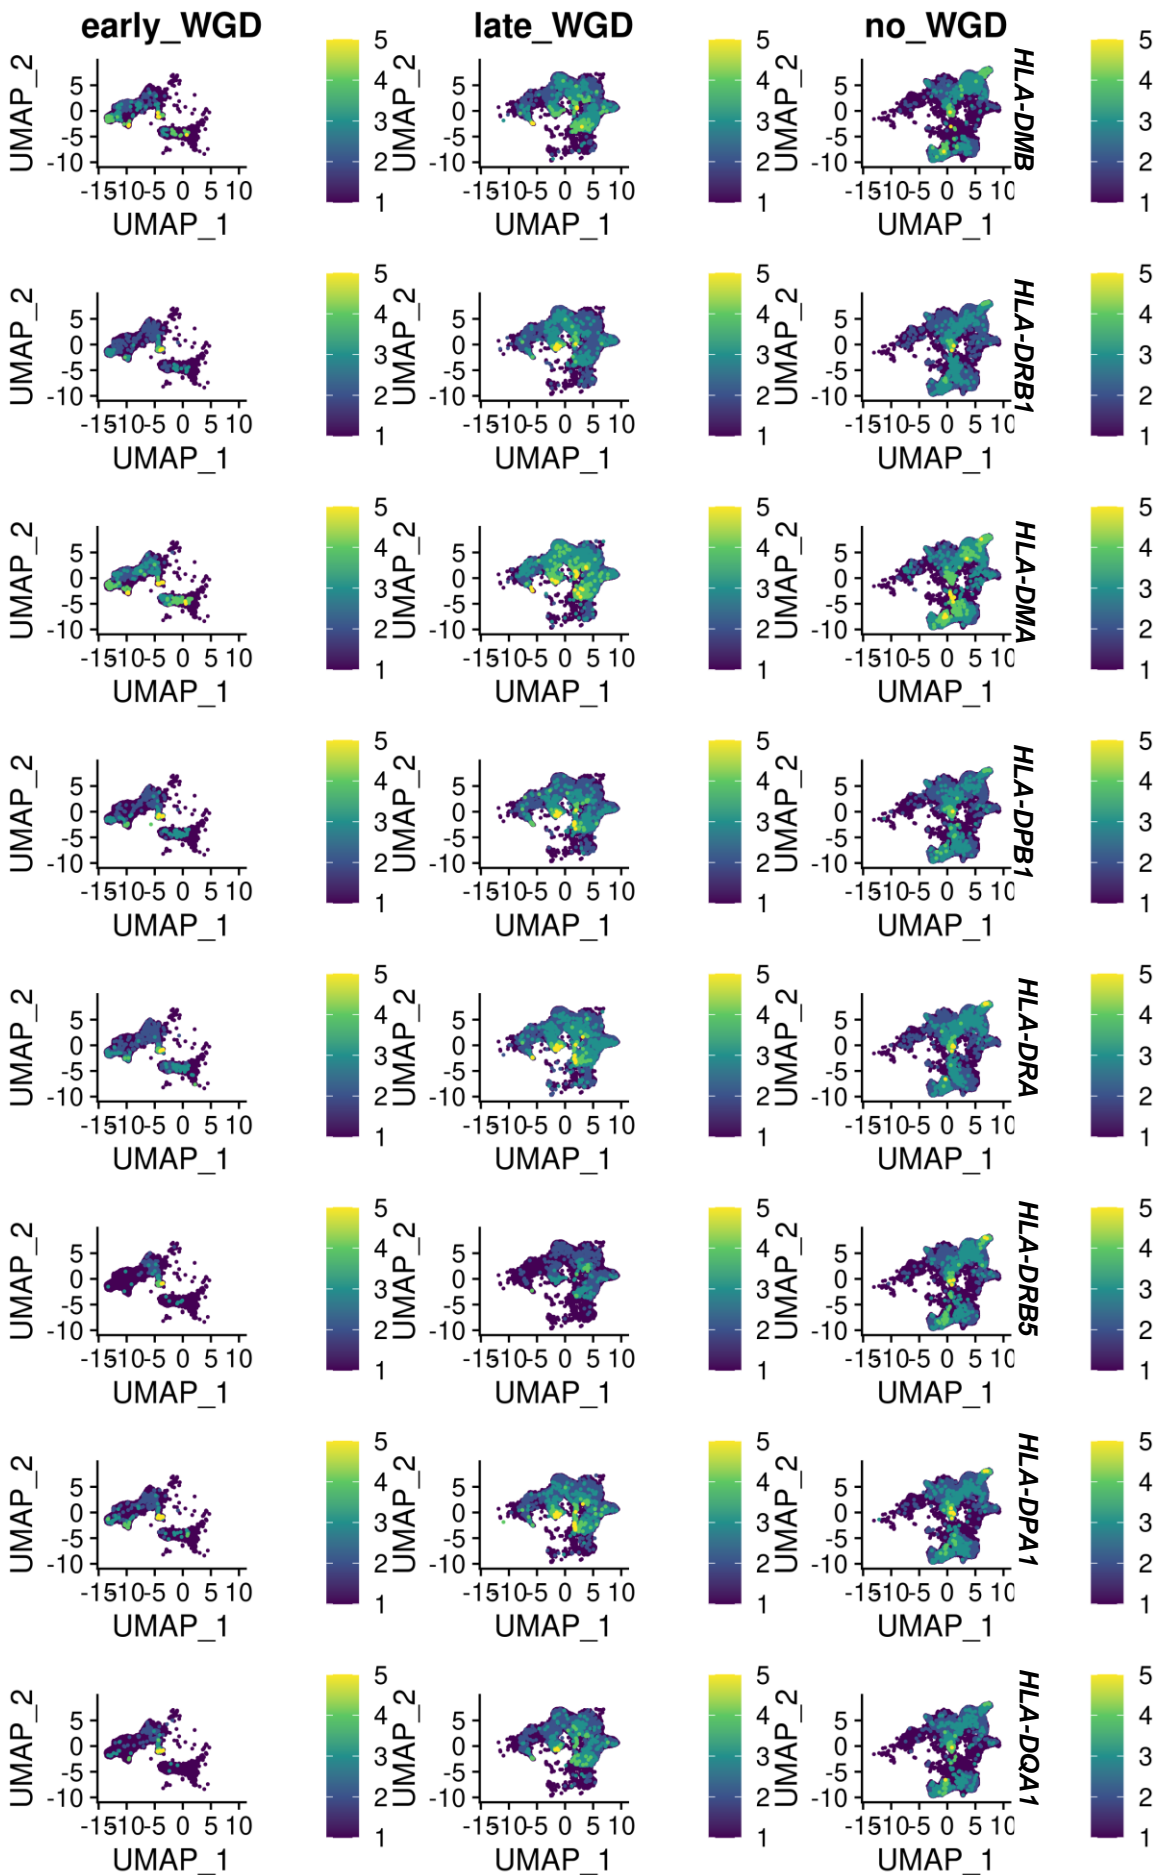

**Supplementary Fig. 4. Expression of MHC-II genes in the snRNAseq data by WGD status.**

Feature UMAP plots of HLA genes which were significant in the bulk RNAseq DGE analysis, showing their expression by whole genome duplication (WGD) status category. Early WGD n = 4 patients, 31,479 nuclei; Late WGD n = 5 patients, 48,685 nuclei; No WGD n = 5 patients, 60,602 nuclei.

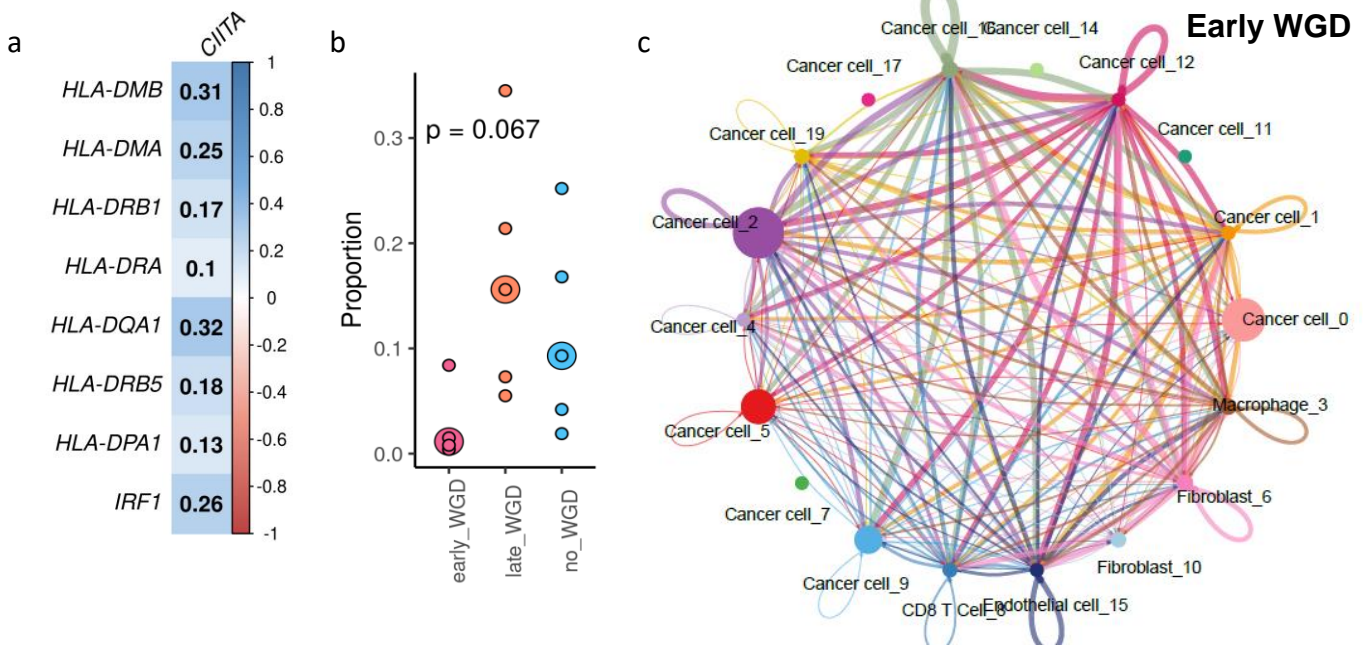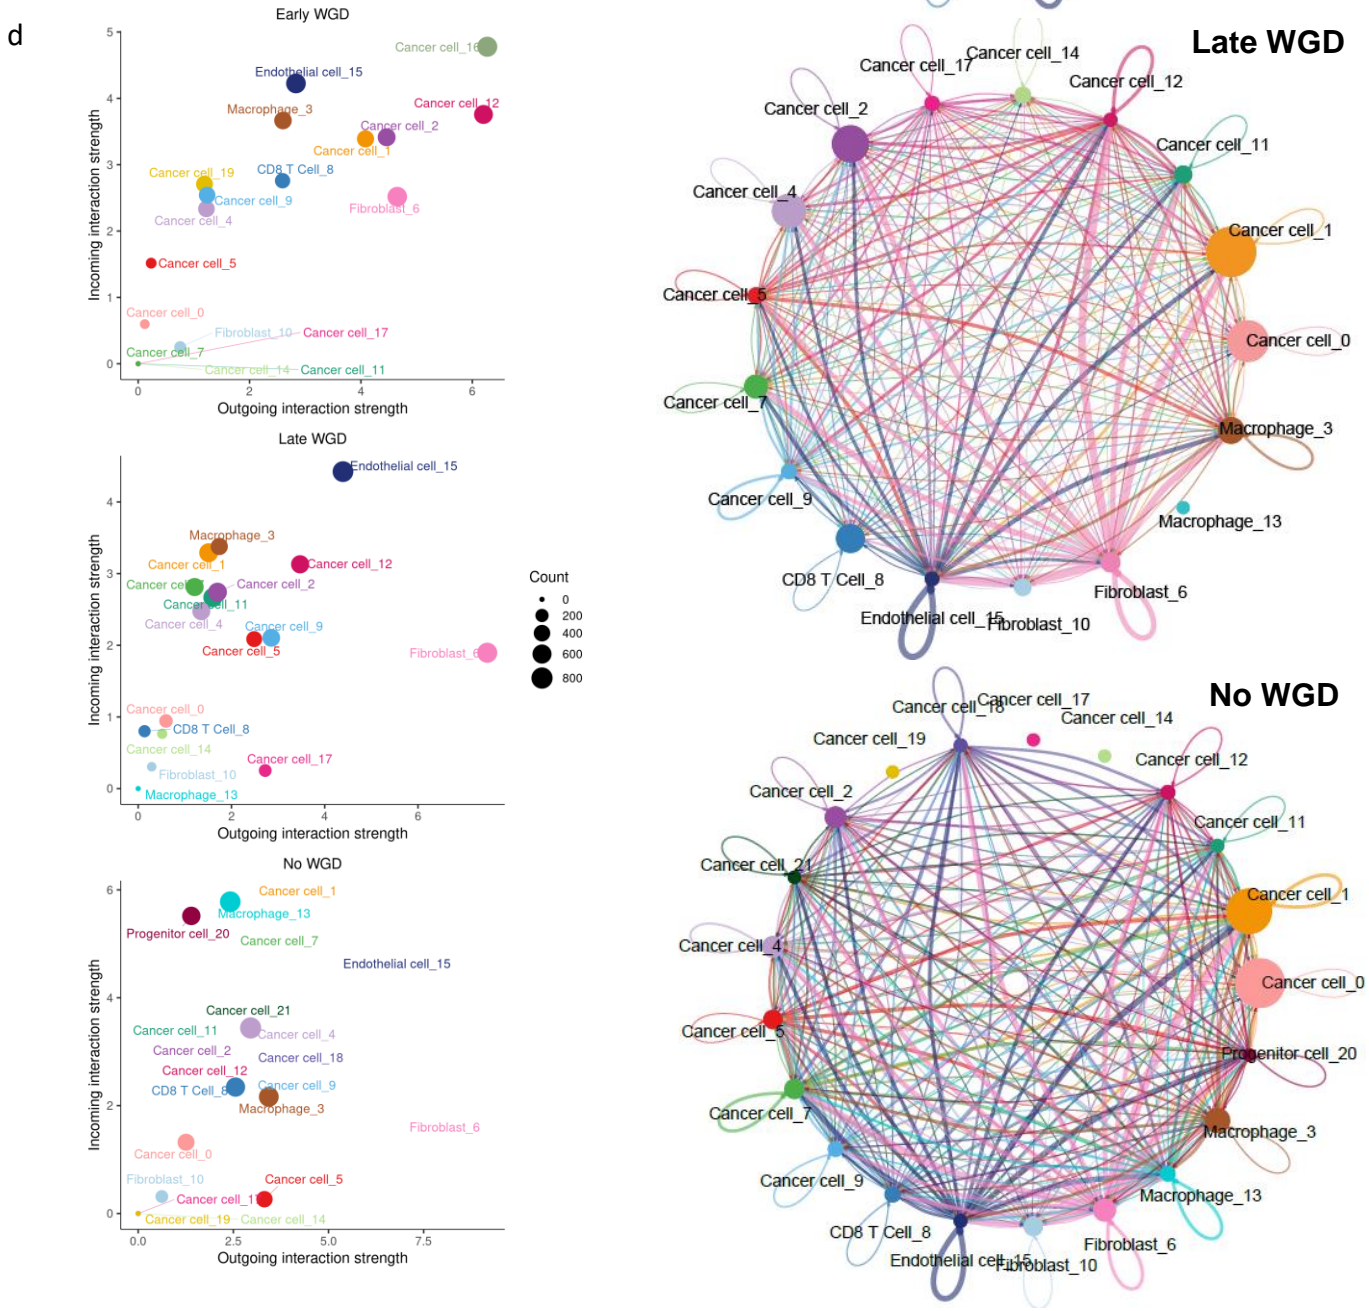

### **Supplementary Fig. 5 MHC-II gene expression in cancer cells.**

a. Correlation of *CIITA*, *IRF1* and selected MHC-II gene expression in cancer cells in snRNAseq. Scale bar indicates correlation R value. All adjusted p values <0.001, calculated with CSCORE. n = 14 patients, 140,766 cancer cell nuclei. b. Dotplot of proportion of cells which are annotated as immune cells as a fraction of total cells, per patient, by whole genome duplication (WGD) status (R = 0.067, Kruskal-Wallis test); individual patients depicted as dots, median by category depicted by larger circle. Early WGD n = 4 patients; Late WGD n = 5 patients; No WGD n = 5 patients. c. Circle network plots visualizing statistically significant interactions between cell clusters. Outer ring and circle color represents cluster identity, line weight represents interaction strength; internal color band represents the cluster of the target of the outgoing signal, the arrow points also to the target of the incoming signal. d. Bubble plots depicting the strength of ingoing and outgoing interactions with other cell subsets, divided by WGD timing category. Count represented by size of circle. Colors (also reflected in Fig.4) enable easier distinguishing between cell subsets n = 177,801 nuclei. Source data are provided as a Source Data file and Supplementary Table 10.
