# Supplementary material for: Timing of whole genome duplication is associated with tumor-specific MHC-II depletion in serous ovarian cancer
Source: PubMed Central journal article supplement (PMC11258338; doi:10.1038/s41467-024-50137-y), 2024-07-18
Supplement: 41467_2024_50137_MOESM3_ESM.pdf [file 41467_2024_50137_MOESM3_ESM.pdf]

## Description of Additional Supplementary Files

File Name: Supplementary Data 1

Description: **FACETS purity**

FACETS purity estimation by sample for ICGC dataset

File Name: Supplementary Data 2

Description: **Differential gene expression analysis for both ICGC & TCGA cohort**

689 genes which are statistically significant in both datasets (glm). P values are adjusted for multiple comparisons

File Name: Supplementary Data 3

Description: **Differential gene expression analysis for both ICGC & TCGA cohort - without copy number log ratio as a covariate**

550 genes which are statistically significant in both datasets (glm). P values are adjusted for multiple comparisons

File Name: Supplementary Data 4

Description: **TCGA Hallmark pathway enrichment score clustering**

Normalised Hallmark pathway enrichment score clusters for the 166 TCGA samples

File Name: Supplementary Data 5

Description: **CIBERSORTx imputations - statistical comparisons**

Comparison of CIBERSORTx imputations per cell subset between WGD status categories. Kruskal-wallis test p values adjusted using Benjamini-Hochberg method.

File Name: Supplementary Data 6

Description: **CIBERSORTx imputations - raw data**

CIBERSORTx imputations for 78 samples (data with  $p \geq 0.05$  excluded)

File Name: Supplementary Data 7

Description: **Characteristics of cases for snRNAseq**

Clinical characteristics of cases for snRNAseq

File Name: Supplementary Data 8

Description: **snRNAseq cell annotations**

Single nuclei RNA sequencing final cell clusters, WGD status, aneuploidy prediction, and cell annotations

File Name: Supplementary Data 9

Description: **Proportions of cell types recovered in snRNAseq**

Proportions of cell types recovered in snRNAseq by WGD status

File Name: Supplementary Data 10

Description: **CellChat ligand-receptor pairs**

Statistically significant interactions inferred by CellChat, which internally adjusts for multiple comparisons (bonferroni method). Threshold for statistical significance is  $p < 0.05$ .
